# Supplementary material for: Sensitivity of Greenland ice sheet projections to spatial resolution in higher-order simulations: the Alfred Wegener Institute (AWI) contribution to ISMIP6 Greenland using the Ice-sheet and Sea-level System Model (ISSM)
Source: Copernicus journal article supplement (doi:10.5194/tc-14-3309-2020), 2020-10-02
Supplement: Supplementary file 1 [file tc-14-3309-2020-supplement.zip]

Archive with 3 entries (3 files):
- analysis_individual_glaciers.xlsx
- tc-14-3309-2020-supplement-title-page.pdf
- SI_ISMIP6_projections_AWI_ISSM.pdf
