# Supplementary material for: Sensitivity of Greenland ice sheet projections to spatial resolution in higher-order simulations: the Alfred Wegener Institute (AWI) contribution to ISMIP6 Greenland using the Ice-sheet and Sea-level System Model (ISSM)
Source: Copernicus journal article supplement (doi:10.5194/tc-14-3309-2020), 2020-10-02
Supplement: Supplementary file 1 [file tc-14-3309-2020-supplement.zip › analysis_individual_glaciers.xlsx]

## Sheet: general trends
Glacier		effect resolution on basal topography			OO-Rmed					OO-Rhigh					RCP8.5-Rnone									RCP8.5-Rmed
	width [km]	high	medium	small	high res more acceleration	high res less acceleration	no dependence on resolution until a threshold crossed	retreat prohibited	inconclusive	high res more acceleration	high res less acceleration	no dependence on resolution until a threshold crossed	retreat prohibited	inconclusive	high res more acceleration	high res less acceleration	high res more deceleration	high res less deceleration	no dependence on resolution until a threshold crossed	no velocity change	equal deceleration	retreat prohibited	inconclusive	high res more acceleration	high res less acceleration	high res more deceleration	high res less deceleration	no dependence on resolution until a threshold crossed	no velocity change	retreat prohibited	inconclusive
Daugard Jensen Glacier	6	x					x			x										x				x
Hays Glacier	4.4		x		x					x							x							x
Helheim Glacier	6.2	x			x					x							x							x
Humboldt Glacier	71			x	x					x													higher resolution lower velocities	x
Jakobshavn Isbræ main	4.2	x			x					x											x			x
Jakobshavn Isbræ north	4.1			x		x								high resolution more decelecation							x					x
Kangerlussuaq Glacier	5.2	x					x							no clear grid dependence			x														high resolution no acceleration, low resolution acceleration reaching speeds of high resolution
KNS	6		x		x			highest resolution only		x							x							x
Nioghalvsfjersbræ	20			x					shift of velocity pattern upstream					shift of velocity pattern upstream								x	shift of velocity pattern upstream						shift of velocity pattern upstream	x
Petermann Gletscher	30			x					upstream acceleration, downstream deceleration, higher resolution less deceleration					upstream acceleration, downstream deceleration, higher resolution less deceleration								x	upstream acceleration, downstream deceleration, higher resolution less deceleration							x	upstream acceleration, downstream deceleration, higher resolution more deceleration and more acceleration
Rink Glacier	2.7		x						high resolution deceleration, low resolution acceleration to slightly higher speeds than high resolution		x						x														high resolution deceleration, low resolution acceleration to slightly higher speeds than high resolution
Rink Isbræ	5.8	x					x					x					x											x
Ryder	19		x			x					x				x							x	shift upstream							x
Store Glacier	6	x							high resolution no acceleration, medium resolution acceleration to speeds of high resolution, lowest resolution no acceleration					higher resolutions deceleration by 2100			x														slight deceleration despite retreat, velocity depends on grid resolution
Upernavik Glacier north	3	x			x					x							x						lower resolution, lower velocities	x
Upernavik Glacier central	3.5	x			x					x							x						lower resolution, lower velocities								acceleration-deceleration in all resolutions, higher speeds in higher resolution
Upernavik Glacier south	2.7	x			x					x							x						lower resolution, lower velocities	x
Zacharias Isbræ	15			x			x							low resolution large acceleration, highest speeds for lowest resolutions									higher resolution decelerationlowest resolution acceleration		slightly
dark blue denotes floating tongue glaciers											blue fields denote clear dependence
											highlights that retreat is prohibited

## Sheet: effects on sliding
Glacier		effect resolution on basal topography			inversion	OO-Rmed					OO-Rhigh					RCP8.5-Rnone						RCP8.5-Rmed						RCP8.5-Rhigh
	width [km]	high	medium	small	strong variation in k^2 with resolution	higher resolution higher N	higher resolution lower N	high resolution more reduction of N	higher resolution larger increase in sliding velocity	inconclusive	higher resolution higher N	higher resolution lower N	high resolution more reduction of N	higher resolution larger increase in sliding velocity	inconclusive	higher resolution higher N	higher resolution lower N	high resolution more reduction of N	higher resolution larger increase in sliding velocity	higher resolution larger decrease in sliding velocity	inconclusive	higher resolution higher N	higher resolution lower N	high resolution more reduction of N	higher resolution larger increase in sliding velocity	higher resolution larger decrease in sliding velocity	inconclusive	higher resolution higher N	higher resolution lower N	high resolution more reduction of N	higher resolution larger increase in sliding velocity	higher resolution larger decrease in sliding velocity	inconclusive
Daugard Jensen Glacier	6	x			x		x					x	x	x			x	x		x			x	x	x				x	x	x
Hays Glacier	4.4		x				x		x			x	x	x			x	x		x			x	x	x				x	x	x
Helheim Glacier	6.2	x			x		x	x	x			x	x	x			x	x		x			x	x	x				x	x	x
Humboldt Glacier	71			x	only for lowest resolution		x	x	x						no trend			x			larger increase in sliding velocity for lower resolutions				x						(x)		sliding velocities remain similar at glacier front
Jakobshavn Isbræ main	4.2	x			x		x	x	x			x	x	x			x	x		x			x	x	x				x	x	x
Jakobshavn Isbræ north	4.1			x	x		x					slightly			higher resolution lower sliding velocity		x	x		x				slightly		x			slightly			x
Kangerlussuaq Glacier	5.2	x			x		x	x							higher resolution higher sliding velocity		x	x		x			x	slightly	(x)		sliding velocities remain similar at glacier front		x	slightly	(x)		high resolution: sliding velocities remain similar at glacier front
KNS	6		x		x		x	x	x			x	x	x			x	x		x			x	x	x				x	x	x
Nioghalvsfjersbræ	20			x	x		x	x	shift to upstream						no trend in N, shift upstream		x						x	x			shift towards upstream		x	x			shift towards upstream
Petermann Gletscher	30			x	x		x	slightly		downstream stronger reduction sliding velocity with increasing resolution, upstream acceleration		x	slightly		downstream stronger reduction sliding velocity with increasing resolution, upstream acceleration		x	slightly			downstream stronger reduction sliding velocity with increasing resolution, upstream acceleration		x	x			downstream stronger reduction sliding velocity with increasing resolution, upstream acceleration		x	x			downstream stronger reduction sliding velocity with increasing resolution, upstream acceleration
Rink Glacier	2.7		x		(x) medium		x					x	x		high resolution no increase in sliding velocity, lower resolution incras to level of high resolution		x	x		x			x	x			high resolutions decrease in sliding velocity, low resolutions increas to the level of high resolution sliding speeds		x	x	x
Rink Isbræ	5.8	x			x		x	x	x					sligthly			x	x		x			x	x	x				x	x	x
Ryder	19		x		x		x	x	only upstream				slightly		higher resolution lower sliding velocity increase		x	x		x			x	x	x				x	x	only upstream
Store Glacier	6	x			x		x	x	x						higher resolution lower sliding velocity		x	x		x			x	x	(x)		sliding velocities remain similar at glacier front		x	(x)		x	lowest resolution slight increase in sliding velocity
Upernavik Glacier north	3	x			x		x	x	x			x	x	x			x	x		x			x	x	(x)		sliding velocities remain similar at glacier front		x	x	x
Upernavik Glacier central	3.5	x			x		x	x	x			x	x	x			x	x		x			x	x	(x)		sliding velocities remain similar at glacier front		x	x	x
Upernavik Glacier south	2.7	x			x		x		x			x		x			x	x		x			x	x	x				x	x	x
Zacharias Isbræ	15			x																	lower resolution higher sliding velocity	slightly		slightly									increasing N with time and resolution, lower sliding velocity for higher resolution
dark blue denotes floating tongue glaciers
												blue fields denote clear dependence
