# Supplementary material for: Sensitivity of Greenland ice sheet projections to spatial resolution in higher-order simulations: the Alfred Wegener Institute (AWI) contribution to ISMIP6 Greenland using the Ice-sheet and Sea-level System Model (ISSM)
Source: Copernicus journal article supplement (doi:10.5194/tc-14-3309-2020), 2020-10-02
Supplement: Supplementary file 1 [file tc-14-3309-2020-supplement.zip › tc-14-3309-2020-supplement-title-page.pdf]

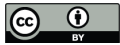

## *Supplement of*

# **Sensitivity of Greenland ice sheet projections to spatial resolution in higher-order simulations: the Alfred Wegener Institute (AWI) contribution to IS-MIP6 Greenland using the Ice-sheet and Sea-level System Model (ISSM)**

**Martin Rückamp et al.**

*Correspondence to:* Martin Rückamp ([martin.rueckamp@awi.de](mailto:martin.rueckamp@awi.de))

- [tc-14-3309-2020-supplement-title-page.pdf](#)
- [SI\\_ISMIP6\\_projections\\_AWI\\_ISSM.pdf](#)
- [analysis\\_individual\\_glaciers.xlsx](#)

The copyright of individual parts of the supplement might differ from the CC BY 4.0 License.
